# Supplementary material
Source: HighWire-hosted journal article supplement (https://jnm.snmjournals.org/highwire/filestream/102667/field_highwire_adjunct_files/0/250977_Supplemental_Data.pdf)
Supplement: 250977_Supplemental_Data.pdf [file 250977_Supplemental_Data.pdf]

## SUPPLEMENTAL METHODS

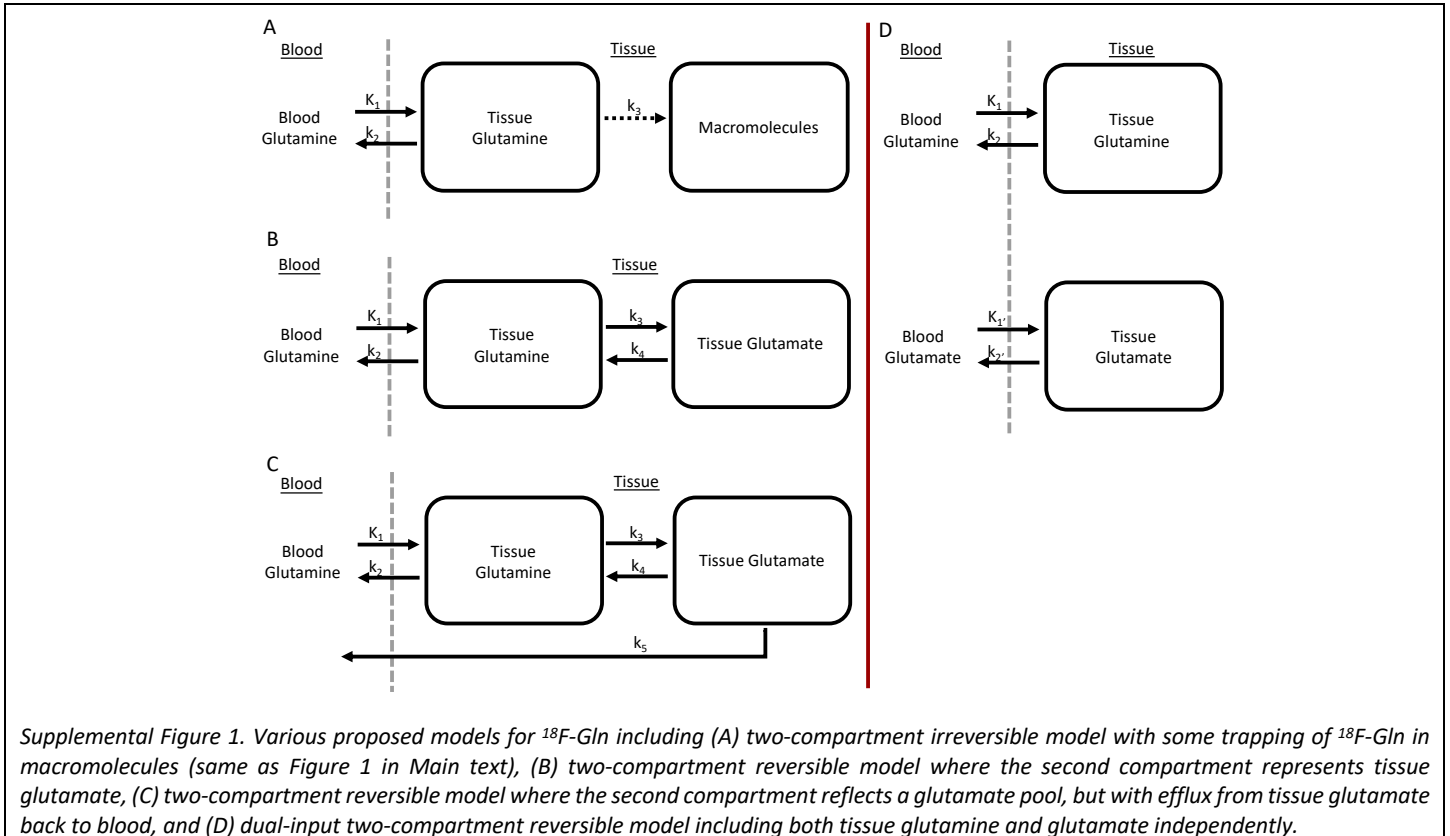

## BIAS CALCULATION

Supplemental Equation 1. Bias and precision calculations for simulations

$$\text{bias} = 100\% * (x - \hat{x})/\hat{x}$$

$$\%SD = IQR/\hat{x}$$

where  $\hat{x}$  is the true value and  $x$  is the measured value.

**SUPPLEMENTAL RESULTS**

**MODEL PARAMETERS SENSITIVITY AND IDENTIFIABILITY**

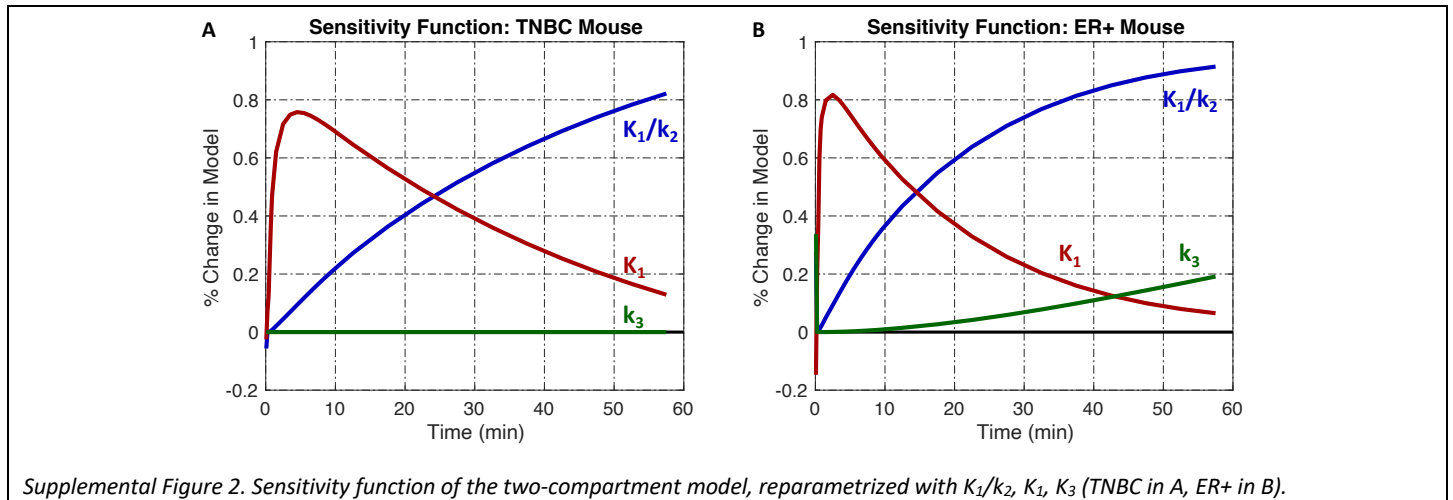

Supplemental Table I. Identifiability matrix of the two-compartment model, reparametrized with  $K_1/k_2$ ,  $K_1$ ,  $K_3$ .

|           | TNBC  |           |       |           | ER+   |           |       |
|-----------|-------|-----------|-------|-----------|-------|-----------|-------|
|           | $K_1$ | $K_1/k_2$ | $k_3$ |           | $K_1$ | $K_1/k_2$ | $k_3$ |
| $K_1$     | 1.00  | -0.80     | 0.71  | $K_1$     | 1.00  | -0.61     | 0.14  |
| $K_1/k_2$ | -0.80 | 1.00      | -0.97 | $K_1/k_2$ | -0.61 | 1.00      | -0.70 |
| $k_3$     | 0.71  | -0.97     | 1.00  | $k_3$     | 0.14  | -0.70     | 1.00  |

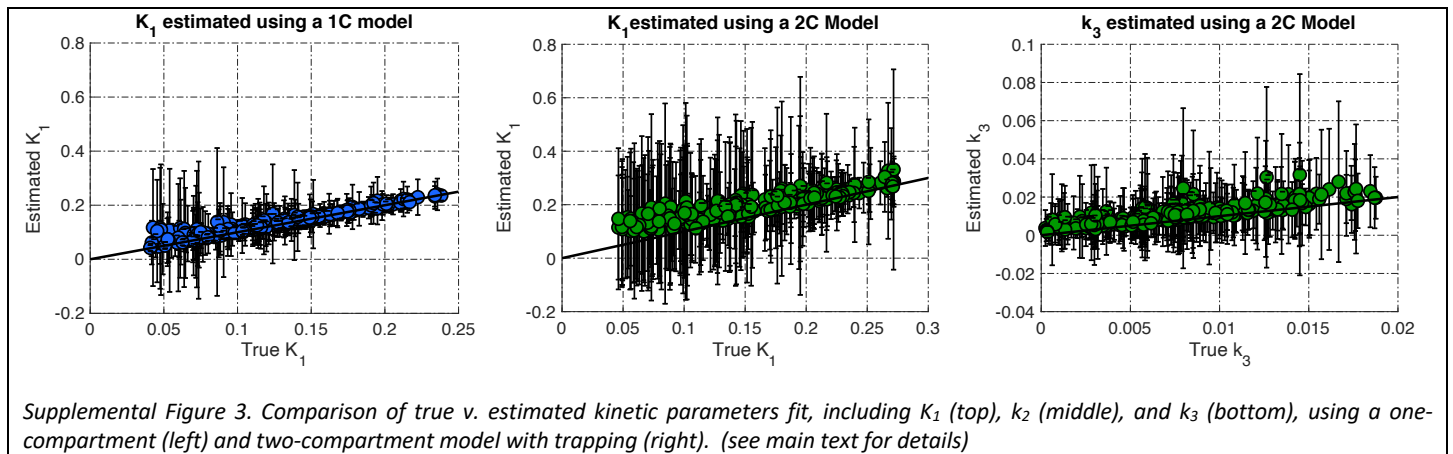

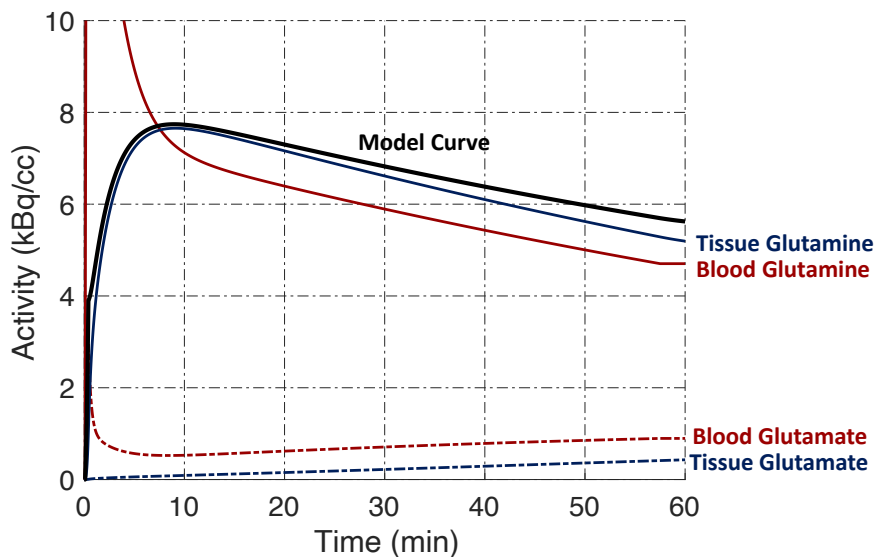

Supplemental Figure 4. TACs for dual-tracer two-compartment reversible model where  $K_1'$  and  $k_2'$  of glutamate is 10% that of glutamine.

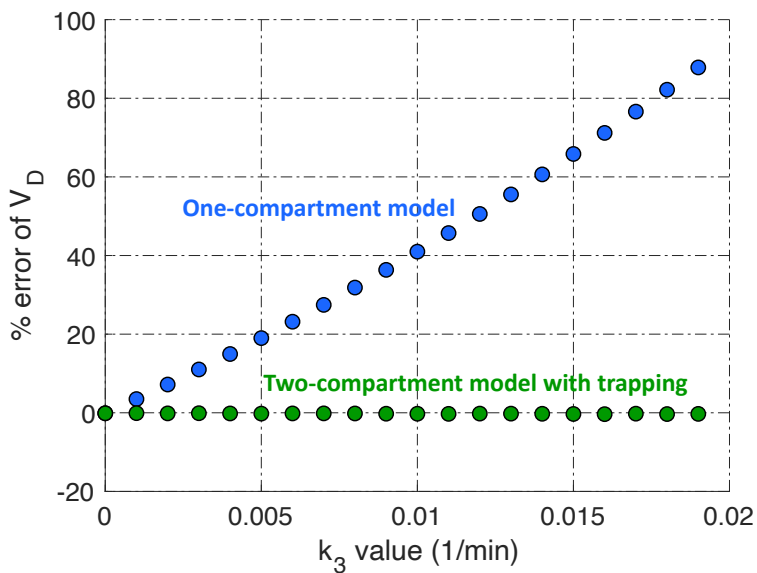

Supplemental Figure 5. Error of estimating  $V_D$  using a one-compartment and two-compartment model for  $k_3$  values ranging from  $0 \text{ min}^{-1}$  to  $0.019 \text{ min}^{-1}$ , with  $K_1$  fixed at  $0.138 \text{ ml/cm}^3/\text{min}$  and  $k_2$  fixed at  $0.131 \text{ min}^{-1}$ .

**A**  **$^{18}\text{F}$ -Fluoroglutamine ( $^{18}\text{F}$ -Gln)**

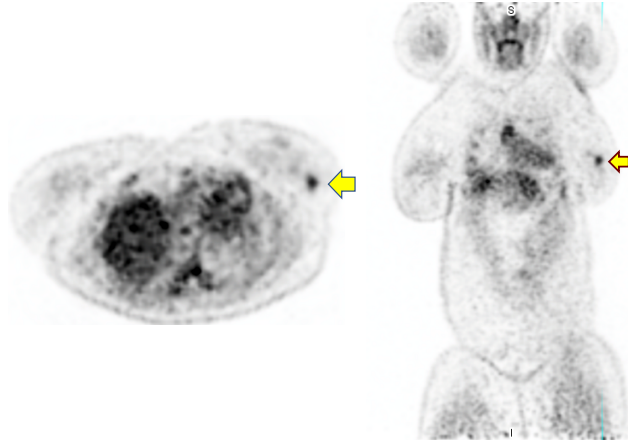

**$^{18}\text{F}$ -Fluorodeoxyglucose (FDG)**

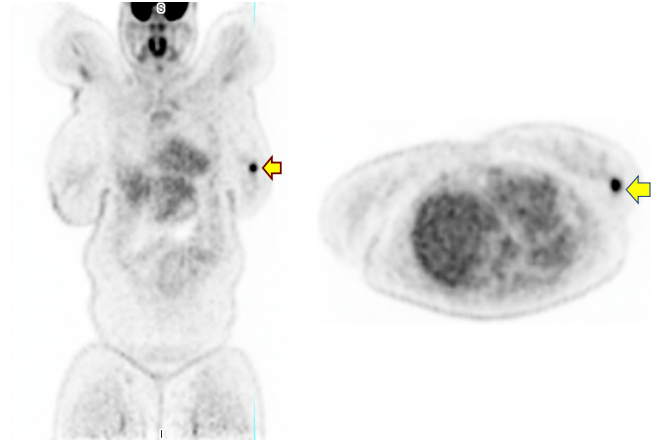

**B**  **$^{18}\text{F}$ -Gln TAC: ER+ Human**

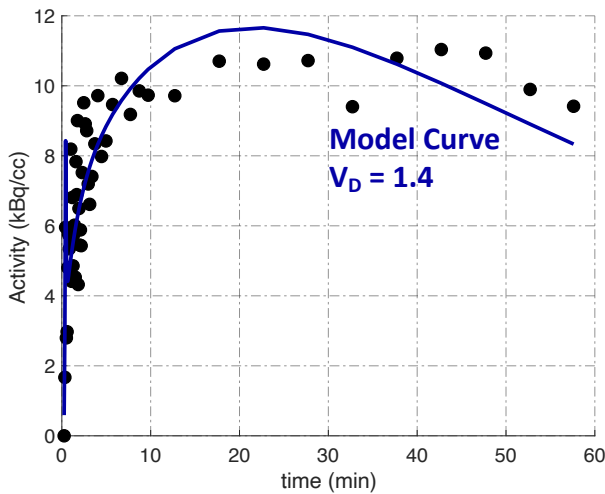

**$^{18}\text{F}$ -Gln TAC: ER+ Human**

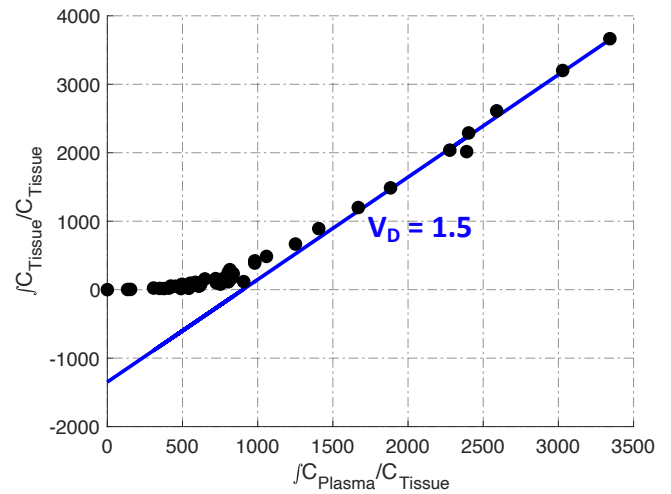

Supplemental Figure 6. Preliminary data from human  $^{18}\text{F}$ -Gln study showing (A) axial and coronal image from an ER+ breast cancer patient imaged with  $^{18}\text{F}$ -Gln (left) and FDG (right). *The institutional review board approved this study and all subjects signed a written informed consent (Clinical Trial Number NCT03863457).* (B) Dynamic  $^{18}\text{F}$ -Gln data fit to a one-compartment model (left) and a Logan plot (right).
